# Supplementary material
Source: MDPI journal article supplement (https://www.mdpi.com/2036-7481/14/4/145)
Supplement: s1 [file s1]

Archive with 1 entries (1 files):
- microbiolres-2605908-supplementary.pdf
